# Supplementary material for: Notably improved inversion of differential mobility particle sizer data obtained under conditions of fluctuating particle number concentrations
Source: Copernicus journal article supplement (doi:10.5194/amt-9-741-2016), 2016-02-29
Supplement: Supplementary file 1 [file amt-9-741-2016-supplement.zip]

## Plots of wind data

The surrounding of the SMEAR III station are heterogeneous (see Figure 3 in the article) and thus the observed aerosol depends on the local wind direction. We here provide plots of wind data collected 32 m above ground level at a tower near the aerosol inlet. Figure 1 shows the wind data for all of 2 March 2015, and Figure 2 shows the data only for the period 10:30 - 12:00 UTC+2h.

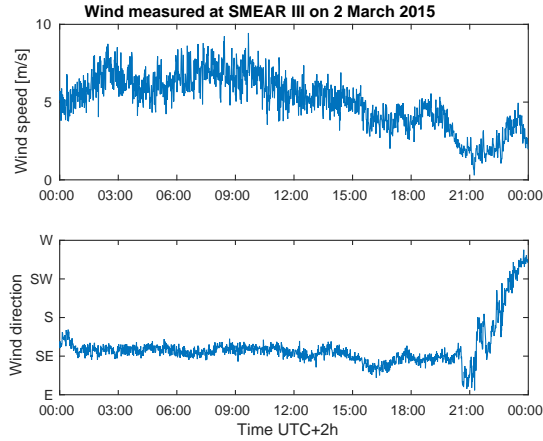

Figure 1: Wind on 2 March at SMEAR III. Same period as in Figure 1 in the article.

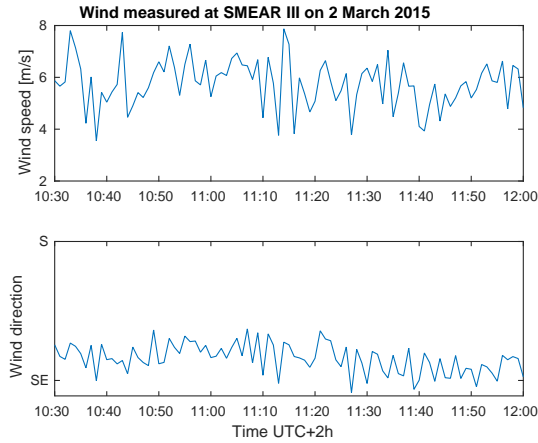

Figure 2: Wind during the time interval 10:30 – 12:00 UTC+2h on 2 March at SMEAR III. Data from this period used in Figures 2 and 6–10 in the article.
