# Supplementary material for: Notably improved inversion of differential mobility particle sizer data obtained under conditions of fluctuating particle number concentrations
Source: Copernicus journal article supplement (doi:10.5194/amt-9-741-2016), 2016-02-29
Supplement: Supplementary file 2 [file amt-9-741-2016-supplement.zip]

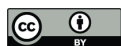

## *Supplement of*

# **Notably improved inversion of differential mobility particle sizer data obtained under conditions of fluctuating particle number concentrations**

**B. Mølgaard et al.**

*Correspondence to:* Bjarke Mølgaard (bjarke.molgaard@helsinki.fi)

- amt-9-741-2016-supplement-title-page.pdf
- Supplement
  - standalone\_demo
    - \* CH150302.DA1
    - \* DMPSinversion\_demo.m
    - \* License.txt
    - \* data\_format.txt
    - \* dp150302.sum
    - \* exp10.m
    - \* gp\_optimDMPS.m
    - \* gp\_setDMPS.m
    - \* gpla\_eDMPS.m
    - \* gpla\_gDMPS.m
    - \* gpla\_predDMPS.m
    - \* gpla\_rndDMPS.m
    - \* hash\_sha512\_DMPS.m
    - \* lik\_countNumber.m
    - \* testdata20150302.mat
  - windplots.pdf

The copyright of individual parts of the supplement might differ from the CC-BY 3.0 licence.
